# Supplementary figures and images for: Muscle Fiber Characteristics and Transcriptome Analysis in Slow- and Fast-Growing Megalobrama amblycephala
Source: MDPI journal article supplement (doi:10.3390/genes15020179), 2024-01-29

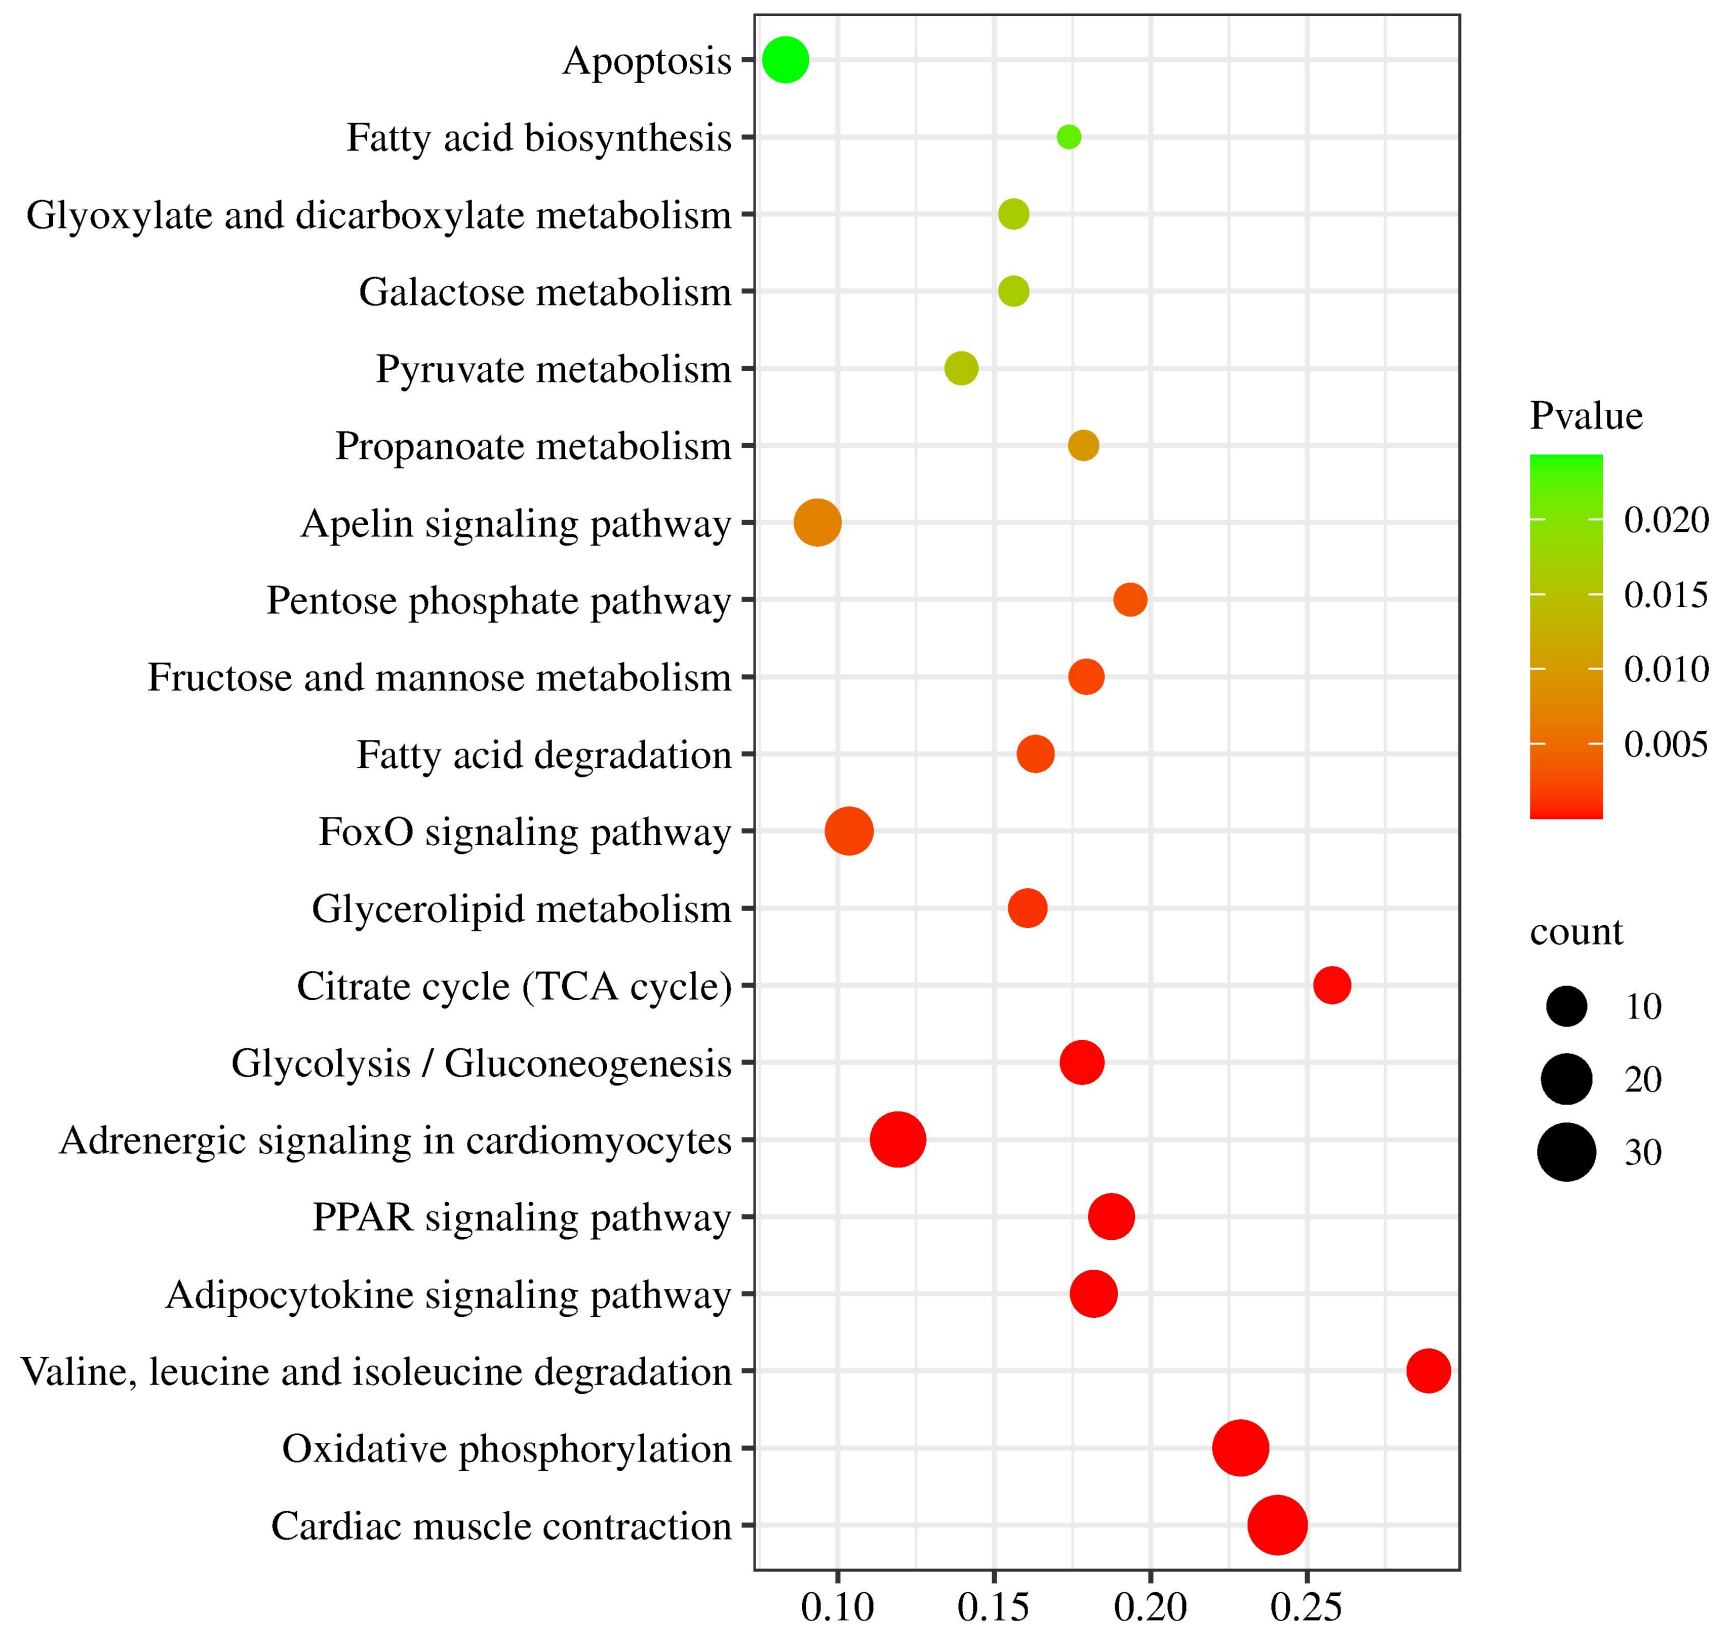

Supplement: s1 [file s1]

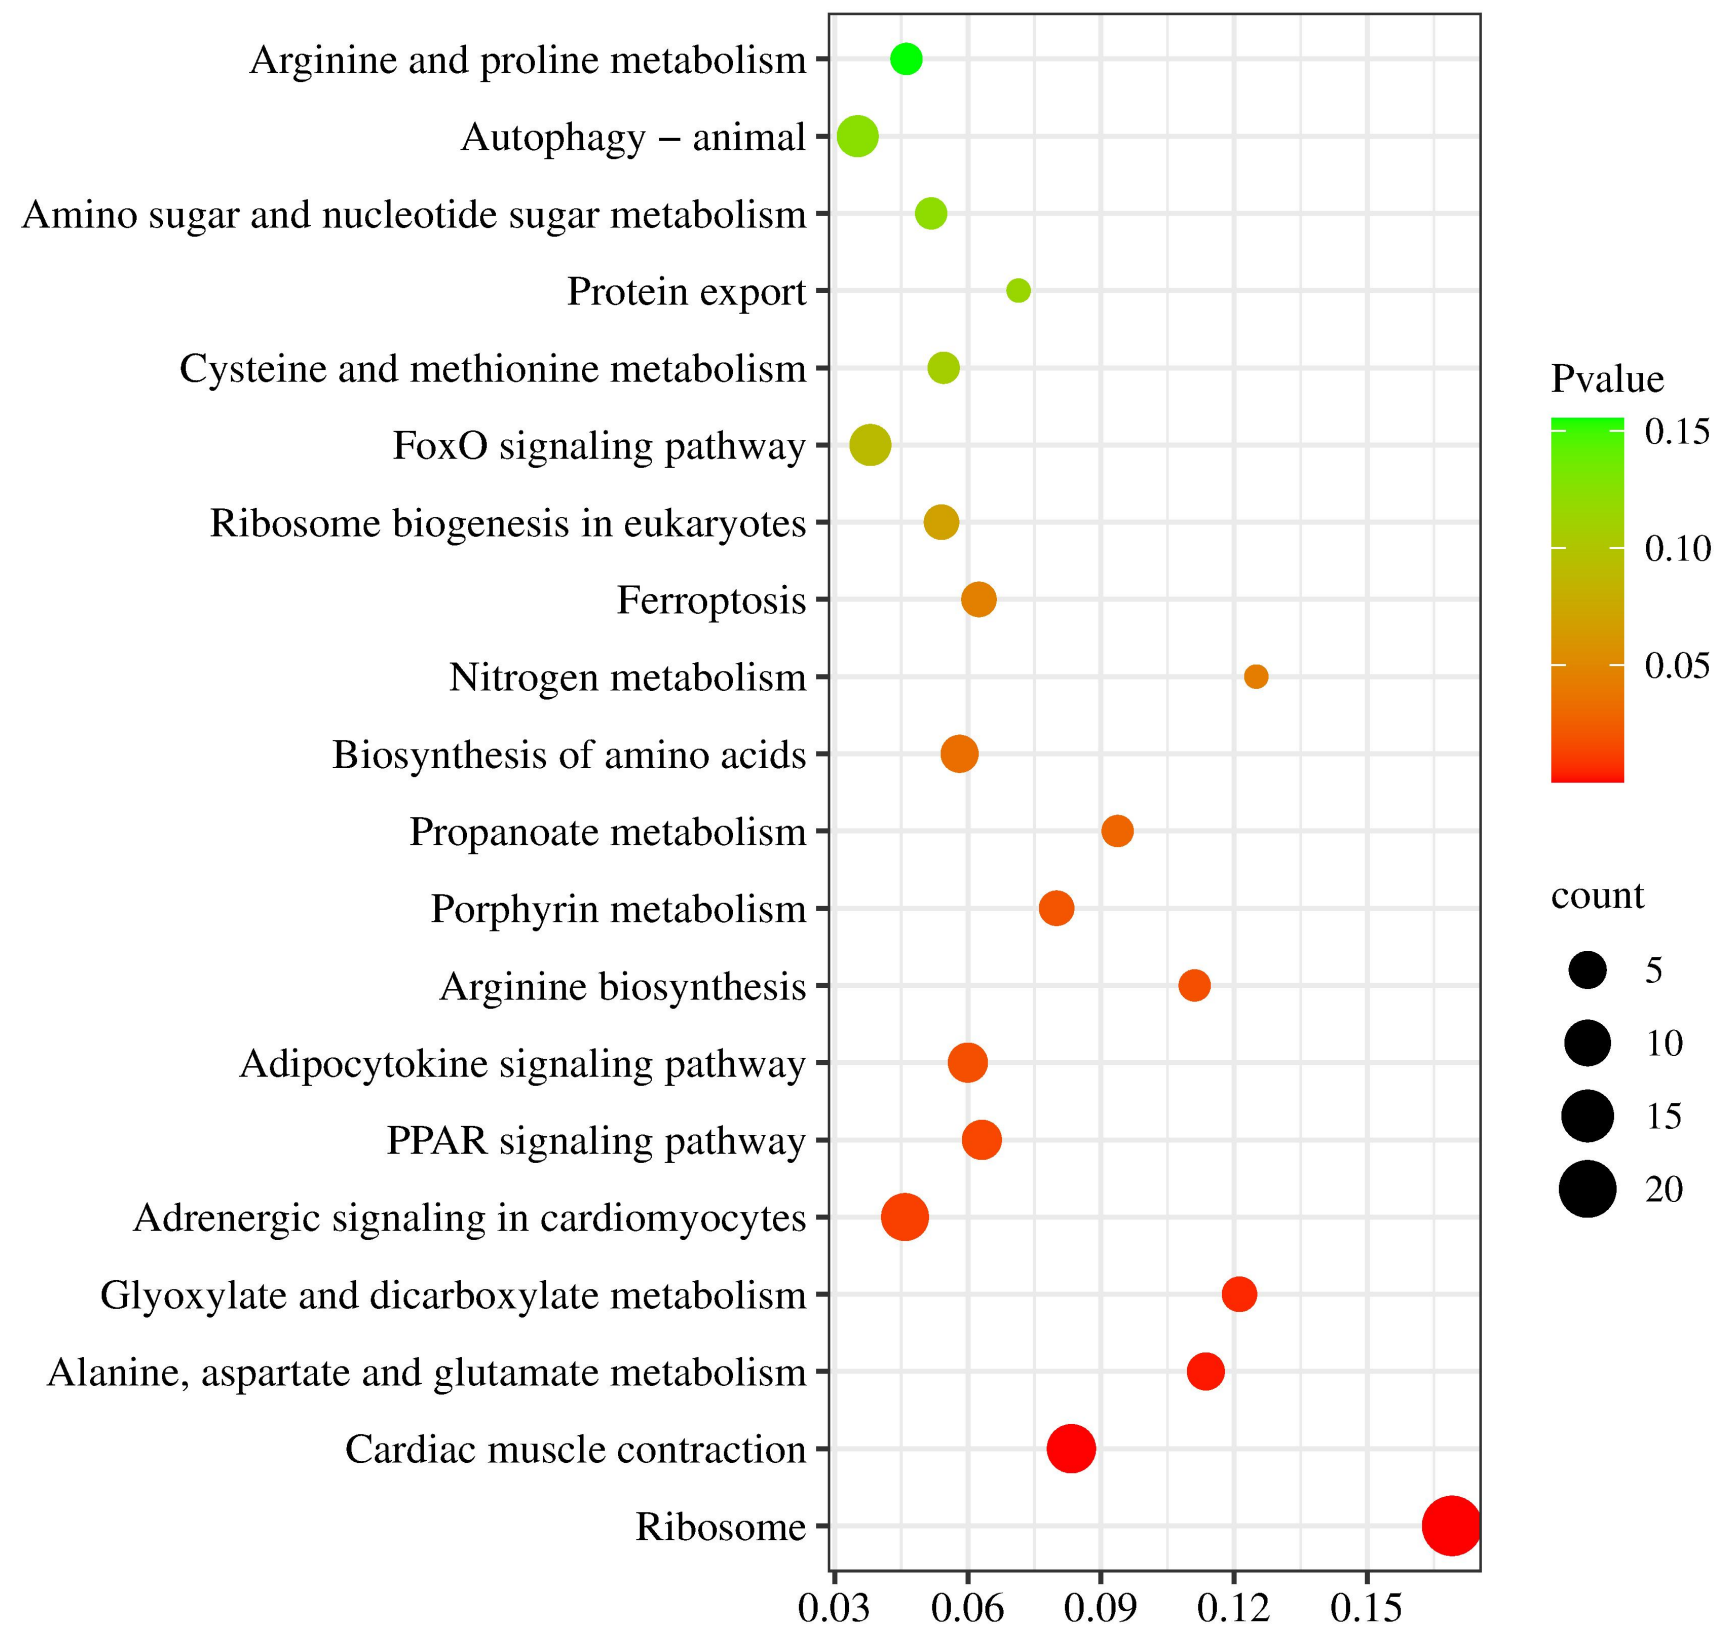

Supplement: s1 [file s1]
